# Supplementary material for: Comparative Transcriptomic Analyses for the Optimization of Thawing Regimes during Conventional Cryopreservation of Mature and Immature Human Testicular Tissue
Source: MDPI journal article supplement (doi:10.3390/ijms25010214), 2023-12-22
Supplement: s1 [file s1]

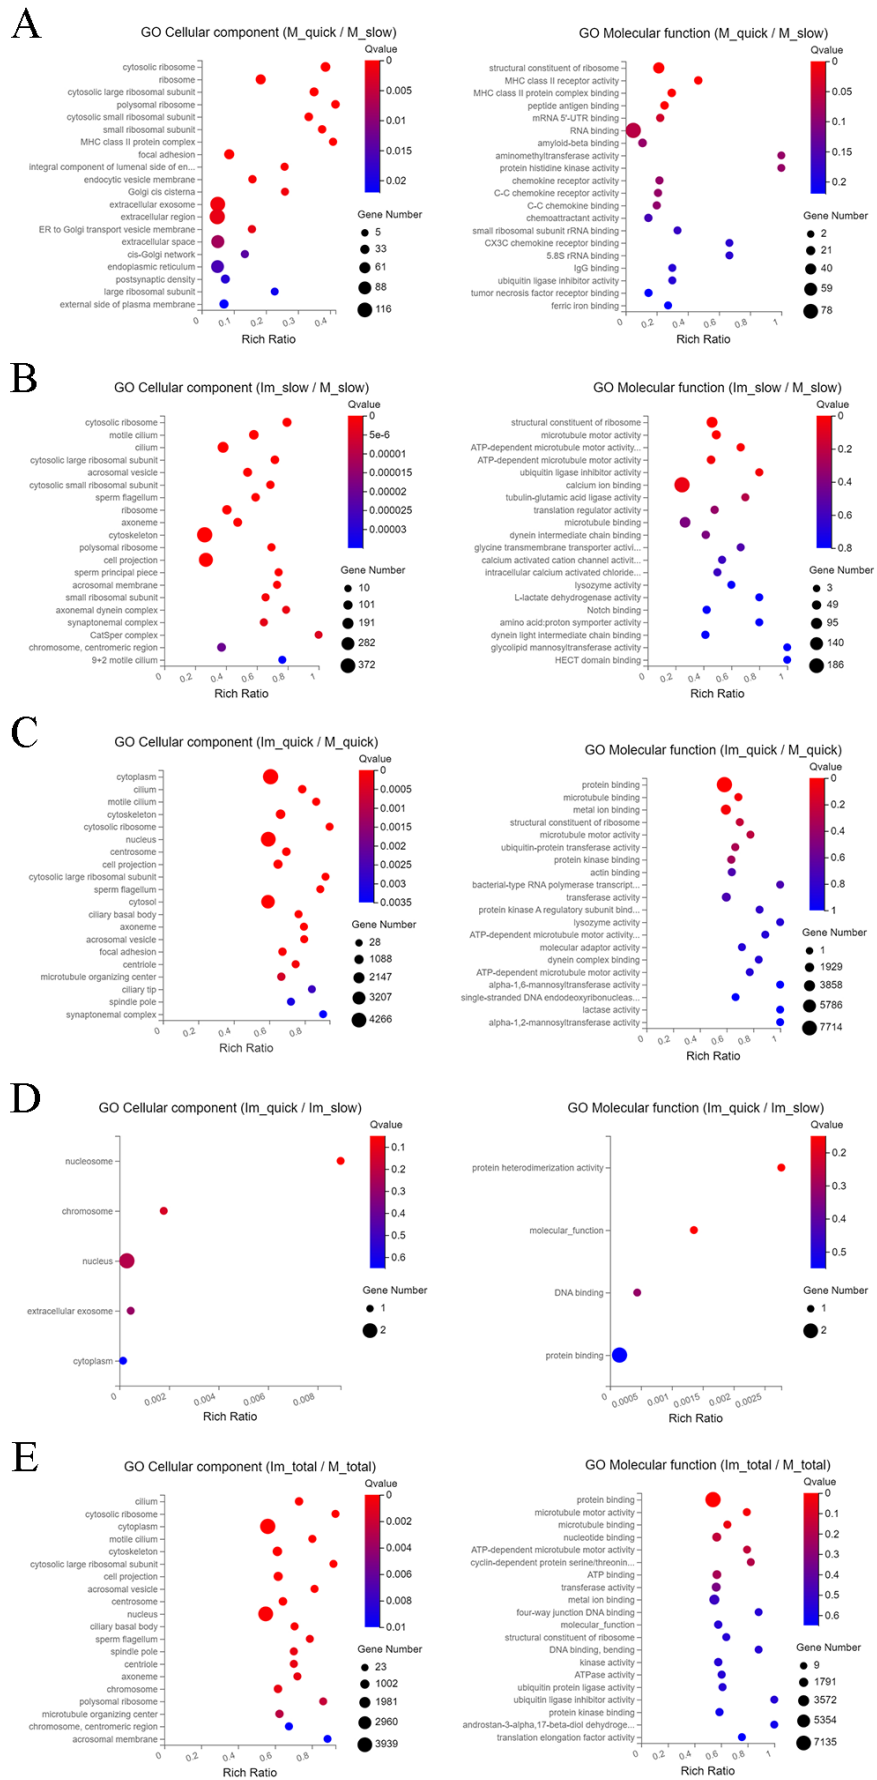

**Figure S1.** GO Cellular component and Molecular function enrichment bubble chart for different groups.
